# Supplementary material
Source: ML conference proceedings conference paper supplement (https://openreview.net/forum?id=2kTX7K6osK)
Supplement: supplementary_material [file attachment]

## A Dataset Supplement

For a description of the RORCO dataset, please refer to Section 2. The dataset is intended broadly for academic research, in particular designing estimators for causal inference. We hope the RORCO dataset encourages more accurate estimators and more comprehensive evaluations. The dataset is available in the `naturalexperiments` Python package.<sup>4</sup> The dataset can be directly downloaded as a CSV from the Github repository.<sup>5</sup> Alternatively, after installing the `naturalexperiments` package with `pip`, the covariates, outcomes, and treatment assignments can be directly loaded in Python with the following code.

```
import naturalexperiments as ne

# Semi-synthetic version
X, y, z = ne.dataloaders["RORCO"]()

# Observational version
X, y, z = ne.dataloaders["RORCO Real"]()
```

Repeated calls to the observational dataloader return the same outcomes and treatment assignment whereas repeated calls to the semi-synthetic dataloader return newly generated outcomes and treatment assignments. We provide an introductory demonstration with examples of the many tools in `naturalexperiments` in the Github repository and, in Appendix B, we showcase almost all of the code used to produce the results in the paper and appendices. The Croissant metadata is available on the Github repository.<sup>6</sup> The authors bear all responsibility in case of a violation of rights. We confirm the use of the MIT license.<sup>7</sup> The code and data will be stored and maintained indefinitely on the Github repository. Interested researchers may email us directly or open issues. When the Dataset nutrition label is approved, we will update the README.md file on the Github repository.

---

<sup>4</sup><https://github.com/rtealwitter/naturalexperiments>

<sup>5</sup>[https://raw.githubusercontent.com/rtealwitter/naturalexperiments/main/naturalexperiments/data/rorco/rorco\\_data.csv](https://raw.githubusercontent.com/rtealwitter/naturalexperiments/main/naturalexperiments/data/rorco/rorco_data.csv)

<sup>6</sup><https://github.com/rtealwitter/naturalexperiments/blob/main/naturalexperiments/data/rorco/metadata.json>

<sup>7</sup><https://github.com/rtealwitter/naturalexperiments/blob/main/LICENSE>

## 507 B Using naturalexperiments

508 The following is the code used to produce almost all of the tables and figures in the paper and  
509 appendices. We exclude the code to produce the ablation and the differential privacy heatmaps  
510 because it is slightly longer.

```
511 import naturalexperiments as ne
512
513 # Dataset summary
514 ne.dataset_table(ne.dataloaders)
515
516 # Dataset plots e.g., outcome by propensity, calibration, etc.
517 ne.plot_all_data(ne.dataloaders)
518
519 # Estimates on RORCO Real
520 variance, times = ne.compute_estimates(methods, "RORCO Real", num_runs
521                                     =100)
522 ne.benchmark_table(variance, times)
523
524 # Benchmark
525 for dataset in ["ACIC 2016", "ACIC 2017", "IHDP", "JOBS", "NEWS", "
526               TWINS", "RORCO"]:
527     variance, times = ne.compute_variance(ne.methods, dataset,
528                                         num_runs=100)
529     ne.benchmark_table(variance, times)
530
531 # Benchmark by number of observations
532 use_methods = ["FlexTENet", "TNet", "TARNet", "RANet", "Double-Double",
533               "Doubly Robust"]
534 methods = {method: ne.methods[method] for method in use_methods}
535 ns = list([x * 1000 for x in range(1, 16)])
536 variance = ne.compute_variance_by_n(methods, "RORCO", ns=ns, num_runs=
537                                   100)
538 ne.plot_estimates(variance, xlabel = "Number of Observations")
539
540 # Benchmark by correlation
541 variance = ne.compute_variance_by_correlation(methods, "RORCO",
542                                               num_runs=100)
543 ne.plot_estimates(variance, xlabel = "Distance Correlation")
544
545 # Benchmark by cross entropy
546 use_methods = ["Regression Discontinuity", "Propensity Stratification",
547               "Adjusted Direct", "Off-policy",
548               "Double-Double", "Doubly Robust"]
549 methods = {method: ne.methods[method] for method in use_methods}
550 variance = ne.compute_variance_by_entropy(methods, "RORCO", num_runs=
551                                           100)
552 ne.plot_estimates(variance, xlabel = "Cross Entropy")
553
```

**C RORCO Real Estimates**

| Method                    | Mean      | 1st Quartile | 2nd Quartile | 3rd Quartile | Time (s) |
|---------------------------|-----------|--------------|--------------|--------------|----------|
| Regression Discontinuity  | 1.54e-01  | 1.12e-01     | 1.65e-01     | 2.08e-01     | 8.61e-04 |
| Propensity Stratification | -2.90e-01 | -4.24e-01    | -2.93e-01    | -1.71e-01    | 2.63e-03 |
| Direct Difference         | -8.78e-02 | -8.78e-02    | -8.78e-02    | -8.78e-02    | 4.60e-04 |
| Adjusted Direct           | 1.55e-02  | -2.04e-02    | 1.06e-02     | 4.33e-02     | 1.10e+01 |
| Horvitz-Thompson          | -5.84e-02 | -8.34e-02    | -6.36e-02    | -3.15e-02    | 4.40e-04 |
| Doubly Robust             | -3.91e-02 | -6.62e-02    | -4.19e-02    | -1.60e-02    | 1.49e+01 |
| TMLE                      | 2.34e-01  | -1.28e+00    | 4.46e-02     | 1.77e+00     | 2.18e+01 |
| Off-policy                | -1.38e-02 | -3.49e-02    | -1.33e-02    | 3.79e-03     | 1.12e+01 |
| Double-Double             | -5.72e-02 | -8.19e-02    | -6.28e-02    | -2.78e-02    | 2.22e+01 |
| Direct Prediction         | -2.23e-02 | -6.71e-02    | -2.53e-02    | 2.49e-02     | 1.12e+01 |
| SNet                      | -5.93e-02 | -5.93e-02    | -5.93e-02    | -5.93e-02    | 4.04e+01 |
| FlexTENet                 | 2.99e-02  | 2.99e-02     | 2.99e-02     | 2.99e-02     | 2.84e+01 |
| OffsetNet                 | 3.34e-02  | 3.34e-02     | 3.34e-02     | 3.34e-02     | 7.42e+00 |
| TNet                      | 5.43e-02  | 5.43e-02     | 5.43e-02     | 5.43e-02     | 7.84e+00 |
| TARNet                    | -2.90e-02 | -2.90e-02    | -2.90e-02    | -2.90e-02    | 6.79e+00 |
| DragonNet                 | 5.36e-03  | 5.36e-03     | 5.36e-03     | 5.36e-03     | 9.33e+00 |
| SNet3                     | -8.72e-03 | -8.72e-03    | -8.72e-03    | -8.72e-03    | 3.43e+01 |
| DRNet                     | -2.05e-02 | -2.05e-02    | -2.05e-02    | -2.05e-02    | 1.45e+01 |
| RANet                     | -7.56e-03 | -7.56e-03    | -7.56e-03    | -7.56e-03    | 1.23e+01 |
| PWNet                     | -1.29e-01 | -1.29e-01    | -1.29e-01    | -1.29e-01    | 1.45e+01 |
| RNet                      | 3.62e-02  | 3.62e-02     | 3.62e-02     | 3.62e-02     | 1.05e+01 |
| XNet                      | 9.33e-02  | 9.33e-02     | 9.33e-02     | 9.33e-02     | 1.90e+01 |

Table 4: Estimates on the RORCO Real dataset. The outcomes are normalized: mean-centered and divided by the standard deviation. There is surprising variation in the estimates from the lowest mean estimate of  $-.607$  to the highest of  $.459$ . Based on our benchmark, we find that Double-Double is the most accurate in the natural setting experiment, suggesting a treatment effect of  $.081$ .

## 556 D Double-Double Variance

557 **Theorem 4.1.** *When the propensity scores are known exactly, the doubly robust estimator with split*  
 558 *training  $\hat{\tau}(\mathbf{z})$  is unbiased i.e.,  $\mathbb{E}_{\mathbf{z}, S_1, S_2}[\hat{\tau}(\mathbf{z}) - \tau] = 0$  with variance given by*

$$\begin{aligned} \text{Var}[\hat{\tau}(\mathbf{z}) - \tau] &= \frac{1}{n^2} \sum_{i=1}^n \mathbb{E}_{\mathbf{z}, S_1, S_2} \left[ \left( (y_i^{(1)} - \hat{f}_{\mathbf{z}, S(i)}^{(1)}(\mathbf{x}_i)) \sqrt{\frac{1-p_i}{p_i}} + (y_i^{(0)} - \hat{f}_{\mathbf{z}, S(i)}^{(0)}(\mathbf{x}_i)) \sqrt{\frac{p_i}{1-p_i}} \right)^2 \right] \\ &\quad + \frac{1}{n^2} \sum_{i \neq j} \mathbb{E}_{\mathbf{z}, S_1, S_2} \left[ \left( \hat{y}_i(\mathbf{z}^{(j \rightarrow 1)}) - \hat{y}_i(\mathbf{z}^{(j \rightarrow 0)}) \right) \left( \hat{y}_j(\mathbf{z}^{(i \rightarrow 1)}) - \hat{y}_j(\mathbf{z}^{(i \rightarrow 0)}) \right) \right]. \end{aligned}$$

559 *Proof.* To simplify notation in the proof, we will drop the subscript on the expectation and variance.  
 560 Recall the estimator is given by

$$\hat{\tau}(\mathbf{z}) = \frac{1}{n} \sum_{i=1}^n \left( \frac{y_i^{(1)} - \hat{y}_i(\mathbf{z})}{p_i} \mathbb{1}_{z_i=1} - \frac{y_i^{(0)} - \hat{y}_i(\mathbf{z})}{1-p_i} \mathbb{1}_{z_i \neq 1} \right).$$

561 By linearity of expectation we have:

$$\mathbb{E}[\hat{\tau}(\mathbf{z})] = \frac{1}{n} \sum_{i=1}^n \mathbb{E} \left[ \frac{y_i^{(1)} - \hat{y}_i(\mathbf{z})}{p_i} \mathbb{1}_{z_i=1} \right] - \mathbb{E} \left[ \frac{y_i^{(0)} - \hat{y}_i(\mathbf{z})}{1-p_i} \mathbb{1}_{z_i \neq 1} \right].$$

562 Then, since the prediction  $\hat{y}_i(\mathbf{z})$  is independent of the treatment assignment  $z_i$ , we can use the fact  
 563 that  $\mathbb{E}[AB] = \mathbb{E}[A] \mathbb{E}[B]$  for indendent random variables  $A, B$  to obtain:

$$\begin{aligned} \mathbb{E}[\hat{\tau}(\mathbf{z})] &= \frac{1}{n} \sum_{i=1}^n \mathbb{E}[y_i^{(1)} - \hat{y}_i(\mathbf{z})] \mathbb{E}[\mathbb{1}_{z_i=1}] / p_i - \mathbb{E}[y_i^{(0)} - \hat{y}_i(\mathbf{z})] \mathbb{E}[\mathbb{1}_{z_i \neq 1}] / (1-p_i) \\ &= \frac{1}{n} \sum_{i=1}^n y_i^{(1)} - \mathbb{E}[\hat{y}_i(\mathbf{z})] - (y_i^{(0)} - \mathbb{E}[\hat{y}_i(\mathbf{z})]) \\ &= \frac{1}{n} \sum_{i=1}^n y_i^{(1)} - y_i^{(0)} = \tau. \end{aligned}$$

564 Above we used the fact that  $\mathbb{E}[\mathbb{1}_{z_i=1}] = p_i$  and  $\mathbb{E}[\mathbb{1}_{z_i \neq 1}] = 1-p_i$ . This is because the prediction  $\hat{y}_i(\mathbf{z})$   
 565 is independent of the treatment assignment  $z_i$ : Crucially, the functions used to learn the prediction  
 566 for  $i$  are not trained on  $i$  itself.

567 We will next analyze the variance of the difference between the estimator and the treatment effect. In  
 568 order to simplify notation, let  $\tau_i = y_i^{(1)} - y_i^{(0)}$  and

$$\hat{\tau}_i(\mathbf{z}) = \frac{y_i^{(1)} - \hat{y}_i(\mathbf{z})}{p_i} \mathbb{1}_{z_i=1} - \frac{y_i^{(0)} - \hat{y}_i(\mathbf{z})}{1-p_i} \mathbb{1}_{z_i \neq 1}.$$

569 Then we have

$$n^2 \text{Var}[\hat{\tau}(\mathbf{z}) - \tau] = \mathbb{E} \left[ \left( \sum_{i=1}^n (\hat{\tau}_i(\mathbf{z}) - \tau_i) \right)^2 \right] = \mathbb{E} \left[ \sum_{i=1}^n (\hat{\tau}_i(\mathbf{z}) - \tau_i)^2 \right] + \mathbb{E} \left[ \sum_{i \neq j} (\hat{\tau}_i(\mathbf{z}) - \tau_i)(\hat{\tau}_j(\mathbf{z}) - \tau_j) \right]. \quad (3)$$

570 First, we will show that

$$\mathbb{E} \left[ \sum_{i=1}^n (\hat{\tau}_i(\mathbf{z}) - \tau_i)^2 \right] = \mathbb{E} \sum_{i=1}^n \left( (y_i^{(1)} - \hat{f}_{\mathbf{z}, S(i)}^{(1)}(\mathbf{x}_i)) \sqrt{\frac{1-p_i}{p_i}} + (y_i^{(0)} - \hat{f}_{\mathbf{z}, S(i)}^{(0)}(\mathbf{x}_i)) \sqrt{\frac{p_i}{1-p_i}} \right)^2. \quad (4)$$

571 In order to simplify the notation, we will use  $\hat{y}_i = \hat{y}_i(\mathbf{z})$  when clear from context. We have

$$\mathbb{E} \left[ \sum_{i=1}^n (\hat{\tau}_i(\mathbf{z}) - \tau_i)^2 \right] = \sum_{i=1}^n \mathbb{E} [(\hat{\tau}_i(\mathbf{z}) - \tau_i)^2] = \sum_{i=1}^n \mathbb{E} [\mathbb{E} [(\hat{\tau}_i(\mathbf{z}) - \tau_i)^2 | S_1, S_2, \mathbf{z}_{-\{i\}}]] . \quad (5)$$

572 In the first equality, we used linearity of expectation while, in the second equality, we used the law of  
573 iterated expectation. Fix  $S_1, S_2, z_{-i}$ , then

$$(\hat{\tau}_i(\mathbf{z}) - \tau_i)^2 = p_i \left( \frac{y_i^{(1)} - \hat{y}_i}{p_i} - (y_i^{(1)} - y_i^{(0)}) \right)^2 + (1 - p_i) \left( -\frac{y_i^{(0)} - \hat{y}_i}{1 - p_i} - (y_i^{(1)} - y_i^{(0)}) \right)^2 \quad (6)$$

$$\begin{aligned} &= p_i \left[ \left( \frac{y_i^{(1)} - \hat{y}_i}{p_i} \right)^2 - 2 \left( \frac{y_i^{(1)} - \hat{y}_i}{p_i} \right) (y_i^{(1)} - y_i^{(0)}) + \left( y_i^{(1)} - y_i^{(0)} \right)^2 \right] \\ &+ (1 - p_i) \left[ \left( \frac{y_i^{(0)} - \hat{y}_i}{1 - p_i} \right)^2 + 2 \left( \frac{y_i^{(0)} - \hat{y}_i}{1 - p_i} \right) (y_i^{(1)} - y_i^{(0)}) + \left( y_i^{(1)} - y_i^{(0)} \right)^2 \right] \quad (7) \end{aligned}$$

574 We foil out each term, divide by  $p_i(1 - p_i)$ , and group the terms in blue. Then

$$\begin{aligned} \textcircled{7} &= \frac{1}{p_i(1 - p_i)} \left[ \left( (y_i^{(1)})^2 - 2\hat{y}_i y_i^{(1)} + \hat{y}_i^2 \right) (1 - p_i) - 2 \left( (y_i^{(1)})^2 - \hat{y}_i y_i^{(1)} - y_i^{(1)} y_i^{(0)} + \hat{y}_i y_i^{(0)} \right) p_i (1 - p_i) \right. \\ &\quad + \left( (y_i^{(0)})^2 - 2\hat{y}_i y_i^{(0)} + \hat{y}_i^2 \right) p_i + 2 \left( y_i^{(0)} y_i^{(1)} - \hat{y}_i y_i^{(1)} - y_i^{(0)} y_i^{(0)} + \hat{y}_i y_i^{(0)} \right) p_i (1 - p_i) \\ &\quad \left. + \left( (y_i^{(1)})^2 + -2y_i^{(1)} y_i^{(0)} + (y_i^{(0)})^2 \right) (1 - p_i) p_i \right] \\ &= \frac{1}{p_i(1 - p_i)} \left[ \left( y_i^{(1)} \right)^2 [1 - p_i - 2p_i(1 - p_i) + (1 - p_i)p_i] \right. \\ &\quad + \left( y_i^{(1)} y_i^{(1)} \right) [2p_i(1 - p_i) + 2p_i(1 - p_i) - 2p_i(1 - p_i)] \\ &\quad + \left( y_i^{(0)} \right)^2 [p_i + 2p_i(1 - p_i) + (1 - p_i)p_i] + \left( \hat{y}_i y_i^{(1)} \right) [-2(1 - p_i) + 2p_i(1 - p_i) - 2p_i(1 - p_i)] \\ &\quad \left. + \left( \hat{y}_i y_i^{(0)} \right) [-2p_i(1 - p_i) - 2p_i + 2p_i(1 - p_i)] + \left( \hat{y}_i \right)^2 (p_i + 1 - p_i) \right] \quad (8) \end{aligned}$$

575 We simplify the factors on the terms in red. Then

$$\begin{aligned} \textcircled{8} &= \frac{1}{p_i(1 - p_i)} \left[ \left( y_i^{(1)} \right)^2 (1 - p_i)^2 + \left( y_i^{(1)} y_i^{(0)} \right) 2(1 - p_i)p_i + \left( y_i^{(0)} \right)^2 (p_i)^2 \right. \\ &\quad \left. - \left( \hat{y}_i y_i^{(1)} \right) 2(1 - p_i) - \left( \hat{y}_i y_i^{(0)} \right) 2p_i + \left( \hat{y}_i \right)^2 \right] \\ &= \frac{\left( (1 - p_i)y_i^{(1)} + p_i y_i^{(0)} \right)^2 - 2\hat{y}_i \left( (1 - p_i)y_i^{(1)} + p_i y_i^{(0)} \right) + \hat{y}_i^2}{p_i(1 - p_i)} \\ &= \frac{\left( (1 - p_i)y_i^{(1)} + p_i y_i^{(0)} - \hat{y}_i \right)^2}{p_i(1 - p_i)} \quad (9) \end{aligned}$$

$$\begin{aligned} &= \frac{\left( (1 - p_i)(y_i^{(1)} - \hat{f}_{\mathbf{z}, S(i)}^{(1)}(\mathbf{x}_i)) + p_i(y_i^{(0)} - \hat{f}_{\mathbf{z}, S(i)}^{(0)}(\mathbf{x}_i)) \right)^2}{p_i(1 - p_i)} \\ &= \left( (y_i^{(1)} - \hat{f}_{\mathbf{z}, S(i)}^{(1)}(\mathbf{x}_i)) \sqrt{\frac{1 - p_i}{p_i}} + (y_i^{(0)} - \hat{f}_{\mathbf{z}, S(i)}^{(0)}(\mathbf{x}_i)) \sqrt{\frac{p_i}{1 - p_i}} \right)^2 . \quad (10) \end{aligned}$$

576 We can check the calculations from Equation [6](#) to Equation [9](#) using the WolframAlpha query linked  
577 [here](#). The penultimate equality follows from the definition of  $\hat{y}_i$ . Then plugging [10](#) into Equation [5](#)  
578 yields Equation [4](#).

579 Recall that  $\mathbf{z}^{(j \rightarrow b)}$  is the treatment assignment vector with  $z_j$  set to  $b$ . Next, we will show that

$$\mathbb{E} \left[ \sum_{i \neq j} (\hat{\tau}_i(\mathbf{z}) - \tau_i)(\hat{\tau}_j(\mathbf{z}) - \tau_j) \right] = \mathbb{E} \left[ \sum_{i \neq j} \left( \hat{y}_i(\mathbf{z}^{(j \rightarrow 1)}) - \hat{y}_i(\mathbf{z}^{(j \rightarrow 0)}) \right) \left( \hat{y}_j(\mathbf{z}^{(i \rightarrow 1)}) - \hat{y}_j(\mathbf{z}^{(i \rightarrow 0)}) \right) \right]. \quad (11)$$

580 For notational brevity, we will use the shorthand

$$\hat{\tau}_i(\mathbf{z}) = \frac{y_i^{(1)} - \hat{y}_i(\mathbf{z})}{p_i} \mathbb{1}_{z_i=1} - \frac{y_i^{(0)} - \hat{y}_i(\mathbf{z})}{1 - p_i} \mathbb{1}_{z_i \neq 1} = (-1)^{1-z_i} \frac{y_i^{(z_i)} - \hat{y}_i(\mathbf{z})}{\pi_i}$$

581 where  $\pi_i = p_i \mathbb{1}_{z_i=1} + (1 - p_i) \mathbb{1}_{z_i \neq 1}$ . We have

$$\mathbb{E} \left[ \sum_{i \neq j} (\hat{\tau}_i(\mathbf{z}) - \tau_i)(\hat{\tau}_j(\mathbf{z}) - \tau_j) \right] = \sum_{i \neq j} \mathbb{E} \left[ \mathbb{E} [(\hat{\tau}_i(\mathbf{z}) - \tau_i)(\hat{\tau}_j(\mathbf{z}) - \tau_j) | S_1, S_2, \mathbf{z}_{-\{i,j\}}] \right] \quad (12)$$

582 where  $\mathbf{z}_{-\{i,j\}}$  is the vector  $\mathbf{z}$  with the  $i$ th and  $j$ th elements removed. The equality follows from lin-  
583 earity of expectation and the law of iterated expectation. We will analyze the conditional expectation

$$\begin{aligned} & \mathbb{E} [(\hat{\tau}_i(\mathbf{z}) - \tau_i)(\hat{\tau}_j(\mathbf{z}) - \tau_j) | S_1, S_2, \mathbf{z}_{-\{i,j\}}] \\ &= \mathbb{E} \left[ \left( (-1)^{1-z_i} \frac{y_i^{(z_i)} - \hat{y}_i(\mathbf{z})}{\pi_i} - \tau_i \right) \left( (-1)^{1-z_j} \frac{y_j^{(z_j)} - \hat{y}_j(\mathbf{z})}{\pi_j} - \tau_j \right) \middle| S_1, S_2, \mathbf{z}_{-\{i,j\}} \right] \\ &= \sum_{z_i, z_j \in \{0,1\}} \pi_i \pi_j \left( (-1)^{1-z_i} \frac{y_i^{(z_i)} - \hat{y}_i(\mathbf{z}^{(j \rightarrow z_j)})}{\pi_i} - \tau_i \right) \left( (-1)^{1-z_j} \frac{y_j^{(z_j)} - \hat{y}_j(\mathbf{z}^{(i \rightarrow z_i)})}{\pi_j} - \tau_j \right) \\ &= \sum_{z_i, z_j \in \{0,1\}} \pi_i \pi_j \left( (-1)^{1-z_i} (-1)^{1-z_j} \frac{(y_i^{(z_i)} - \hat{y}_i(\mathbf{z}^{(j \rightarrow z_j)}))(y_j^{(z_j)} - \hat{y}_j(\mathbf{z}^{(i \rightarrow z_i)}))}{\pi_i \pi_j} \right. \\ & \quad \left. - (-1)^{1-z_i} \frac{y_i^{(z_i)} - \hat{y}_i(\mathbf{z}^{(j \rightarrow z_j)})}{\pi_i} \tau_j - (-1)^{1-z_j} \frac{y_j^{(z_j)} - \hat{y}_j(\mathbf{z}^{(i \rightarrow z_i)})}{\pi_j} \tau_i + \tau_i \tau_j \right). \end{aligned} \quad (13)$$

584 The first equality follows by the definition of  $\hat{\tau}_i$  and  $\tau_i$ . The second equality follows by expanding the  
585 expectation over  $z_i$  and  $z_j$ . The third equality follows by expanding the product of the two terms. We  
586 will first analyze the two cross-terms. Without loss of generality, we will analyze the first cross-term.  
587 We have

$$\begin{aligned} & \sum_{z_i, z_j \in \{0,1\}} \pi_i \pi_j (-1)^{1-z_i} \frac{y_i^{(z_i)} - \hat{y}_i(\mathbf{z}^{(j \rightarrow z_j)})}{\pi_i} \tau_j = \tau_j \sum_{z_i, z_j \in \{0,1\}} \pi_j (-1)^{1-z_i} (y_i^{(z_i)} - \hat{y}_i(\mathbf{z}^{(j \rightarrow z_j)})) \\ &= \tau_j \left( -(1 - p_j)(y_i^{(0)} - \hat{y}_i(\mathbf{z}^{(j \rightarrow 0)})) - p_j(y_i^{(1)} - \hat{y}_i(\mathbf{z}^{(j \rightarrow 1)})) \right) \end{aligned} \quad (14)$$

$$\begin{aligned} & + (1 - p_j)(y_i^{(1)} - \hat{y}_i(\mathbf{z}^{(j \rightarrow 0)})) + p_j(y_i^{(0)} - \hat{y}_i(\mathbf{z}^{(j \rightarrow 1)})) \\ &= \tau_j \left( p_j (y_i^{(1)} - \hat{y}_i(\mathbf{z}^{(j \rightarrow 1)}) - y_i^{(0)} + \hat{y}_i(\mathbf{z}^{(j \rightarrow 1)})) \right) \end{aligned} \quad (15)$$

$$\begin{aligned} & + (1 - p_j) (y_i^{(1)} - \hat{y}_i(\mathbf{z}^{(j \rightarrow 0)}) - y_i^{(0)} + \hat{y}_i(\mathbf{z}^{(j \rightarrow 0)})) \\ &= \tau_j (p_j (y_i^{(1)} - y_i^{(0)}) + (1 - p_j)(y_i^{(1)} - y_i^{(0)})) = \tau_j (y_i^{(1)} - y_i^{(0)}) = \tau_j \tau_i. \end{aligned} \quad (16)$$

588 Distributing the sum and plugging in Equation 16 twice, we have

$$(13) = \left( \sum_{z_i, z_j \in \{0,1\}} (-1)^{1-z_i} (-1)^{1-z_j} (y_i^{(z_i)} - \hat{y}_i(\mathbf{z}^{(j \rightarrow z_j)})) (y_j^{(z_j)} - \hat{y}_j(\mathbf{z}^{(i \rightarrow z_i)})) \right) - \tau_i \tau_j. \quad (17)$$

589 Then we have (13) +  $\tau_i \tau_j$  equal to

$$\begin{aligned}
& \left( y_i^{(0)} - \hat{y}_i(\mathbf{z}^{(j \rightarrow 0)}) \right) \left( y_j^{(0)} - \hat{y}_j(\mathbf{z}^{(i \rightarrow 0)}) \right) - \left( y_i^{(0)} - \hat{y}_i(\mathbf{z}^{(j \rightarrow 1)}) \right) \left( y_j^{(1)} - \hat{y}_j(\mathbf{z}^{(i \rightarrow 0)}) \right) \\
& - \left( y_i^{(1)} - \hat{y}_i(\mathbf{z}^{(j \rightarrow 0)}) \right) \left( y_j^{(0)} - \hat{y}_j(\mathbf{z}^{(i \rightarrow 1)}) \right) + \left( y_i^{(1)} - \hat{y}_i(\mathbf{z}^{(j \rightarrow 1)}) \right) \left( y_j^{(1)} - \hat{y}_j(\mathbf{z}^{(i \rightarrow 1)}) \right). \\
& = -\hat{y}_i(\mathbf{z}^{(j \rightarrow 0)}) \left( y_j^{(0)} - \hat{y}_j(\mathbf{z}^{(i \rightarrow 0)}) - y_j^{(0)} + \hat{y}_j(\mathbf{z}^{(i \rightarrow 1)}) \right) + \hat{y}_i(\mathbf{z}^{(j \rightarrow 1)}) \left( y_j^{(1)} - \hat{y}_j(\mathbf{z}^{(i \rightarrow 0)}) - y_j^{(1)} + \hat{y}_j(\mathbf{z}^{(i \rightarrow 1)}) \right) \\
& + y_i^{(0)} \left( y_j^{(0)} - \hat{y}_j(\mathbf{z}^{(i \rightarrow 0)}) - y_j^{(1)} + \hat{y}_j(\mathbf{z}^{(i \rightarrow 0)}) \right) - y_i^{(1)} \left( y_j^{(0)} - \hat{y}_j(\mathbf{z}^{(i \rightarrow 1)}) - y_j^{(1)} + \hat{y}_j(\mathbf{z}^{(i \rightarrow 1)}) \right) \\
& = -\hat{y}_i(\mathbf{z}^{(j \rightarrow 0)}) \left( \hat{y}_j(\mathbf{z}^{(i \rightarrow 1)}) - \hat{y}_j(\mathbf{z}^{(i \rightarrow 0)}) \right) + \hat{y}_i(\mathbf{z}^{(j \rightarrow 1)}) \left( \hat{y}_j(\mathbf{z}^{(i \rightarrow 1)}) - \hat{y}_j(\mathbf{z}^{(i \rightarrow 0)}) \right) \\
& + y_i^{(0)} \left( y_j^{(0)} - y_j^{(1)} \right) - y_i^{(1)} \left( y_j^{(0)} - y_j^{(1)} \right) \\
& = \left( \hat{y}_i(\mathbf{z}^{(j \rightarrow 1)}) - \hat{y}_i(\mathbf{z}^{(j \rightarrow 0)}) \right) \left( \hat{y}_j(\mathbf{z}^{(i \rightarrow 1)}) - \hat{y}_j(\mathbf{z}^{(i \rightarrow 0)}) \right) + \tau_i \tau_j. \tag{18}
\end{aligned}$$

590 Plugging Equation 18 back into Equation 13 and then back into Equation 12 yields Equation 11.

591 Finally, the claimed variance in Equation 3 follows from Equations 4 and 11.

592 □

## 593 E Connection to Doubly Robust Estimator

594 The Double-Double estimator described in Algorithm 1 is equivalent to a doubly robust estimator  
 595 with the same learned functions. We show the algebraic equivalence below.

596 We used the learned prediction

$$\hat{y}_i(\mathbf{z}) = (1 - p_i) \hat{f}_{\mathbf{z}, S(i)}^{(1)}(\mathbf{x}_i) + p_i \hat{f}_{\mathbf{z}, S(i)}^{(0)}(\mathbf{x}_i).$$

597 in the estimator

$$\hat{\tau}(\mathbf{z}) = \frac{1}{n} \sum_{i=1}^n \left( \frac{y_i^{(1)} - \hat{y}_i(\mathbf{z})}{p_i} \mathbb{1}_{z_i=1} - \frac{y_i^{(0)} - \hat{y}_i(\mathbf{z})}{1 - p_i} \mathbb{1}_{z_i \neq 1} \right).$$

598 Plugging in the prediction, the estimator is then

$$\begin{aligned} \hat{\tau}(\mathbf{z}) &= \frac{1}{n} \sum_{i=1}^n \left( \frac{y_i^{(1)} - (1 - p_i) \hat{f}_{\mathbf{z}, S(i)}^{(1)}(\mathbf{x}_i) - p_i \hat{f}_{\mathbf{z}, S(i)}^{(0)}(\mathbf{x}_i)}{p_i} \mathbb{1}_{z_i=1} \right. \\ &\quad \left. - \frac{y_i^{(0)} - (1 - p_i) \hat{f}_{\mathbf{z}, S(i)}^{(1)}(\mathbf{x}_i) - p_i \hat{f}_{\mathbf{z}, S(i)}^{(0)}(\mathbf{x}_i)}{1 - p_i} \mathbb{1}_{z_i \neq 1} \right) \\ &= \frac{1}{n} \sum_{i=1}^n \left( \left( \frac{y_i^{(1)} - \hat{f}_{\mathbf{z}, S(i)}^{(1)}(\mathbf{x}_i)}{p_i} + \hat{f}_{\mathbf{z}, S(i)}^{(1)}(\mathbf{x}_i) - \hat{f}_{\mathbf{z}, S(i)}^{(0)}(\mathbf{x}_i) \right) \mathbb{1}_{z_i=1} \right. \\ &\quad \left. - \left( \frac{y_i^{(0)} - \hat{f}_{\mathbf{z}, S(i)}^{(0)}(\mathbf{x}_i)}{1 - p_i} - \hat{f}_{\mathbf{z}, S(i)}^{(1)}(\mathbf{x}_i) + \hat{f}_{\mathbf{z}, S(i)}^{(0)}(\mathbf{x}_i) \right) \mathbb{1}_{z_i \neq 1} \right) \\ &= \frac{1}{n} \sum_{i=1}^n \left( \frac{y_i^{(1)} - \hat{f}_{\mathbf{z}, S(i)}^{(1)}(\mathbf{x}_i)}{p_i} \mathbb{1}_{z_i=1} - \frac{y_i^{(0)} - \hat{f}_{\mathbf{z}, S(i)}^{(0)}(\mathbf{x}_i)}{1 - p_i} \mathbb{1}_{z_i \neq 1} + \hat{f}_{\mathbf{z}, S(i)}^{(1)}(\mathbf{x}_i) - \hat{f}_{\mathbf{z}, S(i)}^{(0)}(\mathbf{x}_i) \right). \end{aligned}$$

599 The final expression is a doubly robust estimator with the same learned functions.



## F Extended Related Work

There are many approaches to treatment effect estimation in the literature. Some of the approaches, like estimators for time series data [BCG17, WSBG18] and design based controls [LD20, Kal18, ADR21, AAM<sup>+</sup>22, HSSZ23], are inappropriate for our setting because we only have one measurement of the outcomes and no control over which observations receive the treatment.

We use propensity scores to account for the probability that an observation received the treatment. There are many estimators that use propensity scores like propensity score matching and propensity stratification [Aus11, Lin14, AS15]. However, in natural experiments, the propensity scores tend to be close to 0 or 1 so propensity score matching and stratification give high variance estimates because of the imbalance in the number of observations that received the treatment or control. Instead, we focus on inverse propensity score weighting and a popular method called the Horvitz-Thompson estimator [HT52, BHAB18]. While the Horvitz-Thompson estimator is similarly prone to high variance, it is common to reduce the variance by adjusting the estimator with a prediction.

There are many estimators that use predictions including regression adjustment, regression discontinuity, and direct regression on the propensity scores [Rho10, CKLP17, CT22]. Some prior work on regression based adjustment estimators tend to make strong assumptions, for example that outcomes are a linear function of the covariates or that the treatment effect is additive [Ros02, TDZL08, NW21a]. For example, regression discontinuity assumes that the treatment effect is not correlated with propensity scores and so can be accurately estimated from observations with similar propensity scores [IL08]. Some work on designing estimators with propensity scores and regression adjustments tend to describe the asymptotic variance at the expense of the constants that effect the performance in the finite setting [Fre08, BLB<sup>+</sup>09, Ken23].

There are several estimators with theoretical guarantees use include propensity scores and learned predictions. Targeted maximum likelihood estimation (TMLE) refines an initial prediction for treatment effect estimation using propensity scores [VdLR<sup>+</sup>11, SR17, Ken23]. Doubly robust estimators are designed to yield asymptotically correct results if they have accurate predictions of either the propensity scores or the outcomes under the treatment and control [SRR99, KS07]. Doubly robust estimators have been extensively studied and optimized in the setting where predictions are linear function [VVI5, Tan20].

Recently, there has been substantial work designing neural network architectures and loss functions to estimate treatment effects. DragonNet uses a specialized architecture and targeted regularization [SBV19]. XNet and RANet uses a regression-adjusted pseudo-outcome [KSBY19, CVdS21a]. OffsetNET estimates an offset and TNet uses a vanilla neural network architecture while FlexTENET, SNets, and TARNet use ideas from multi-task and representation learning [CVdS21b]. RNet uses a two-stage optimization approach [NW21b]. PWNNet is designed for the Horvitz-Thompson estimator [CVdS21a]. DRNet is designed for a doubly robust estimator [Ken23].

Our work is most similar to two recent papers that have analyzed the Horvitz-Thompson estimator with predictions in the finite population setting. Ghadiri et al. prove theoretical bounds on the variance when the propensity scores are all uniform and the prediction is learned from a linear function [GAM<sup>+</sup>24]. We consider a similar estimator but in the natural experiment setting for general probabilities and with a more powerful prediction learned from nonlinear functions. However, since the functions we use are in general neural networks, we do not give guarantees on the quality of the prediction. The estimator we propose is similar to the Off-policy estimator given by Mou et al. but differs in three ways [MWB22]. First, we learn one function for the treatment outcomes and one for the control outcomes instead of the single function learned by Mou et al. Second, the loss we use to learn the function has an additional multiplicative factor that we theoretically justify. Third, a term in their final estimator has a factor of  $\frac{1}{2}$  that we do not have. Together, the differences in our estimator improve its performance substantially over the Mou et al. Off-policy estimator.

## 648 G Description of Other Estimators

649 **Regression Discontinuity** The estimator takes the difference between outcomes under the treatment  
 650 and control in a small region of propensity scores. Let  $S_w = \{i : \frac{1}{2} - w \leq p_i \leq \frac{1}{2} + w\}$ . The  
 651 estimator is given by  $\text{mean}(\{y^{(1)} : i \in S_w, z_i = 1\}) - \text{mean}(\{y^{(0)} : i \in S_w, z_i \neq 1\})$ .

652 **Propensity Stratification** The estimator takes the average of the difference between mean treatment  
 653 outcome and mean control outcome over  $q$  different  $q$ -quantiles of the propensity scores. The  
 654 estimator is given by

$$\frac{1}{q} \sum_{k=1}^q \left[ \text{mean}(\{y_i^{(1)} : \frac{k-1}{q} \leq p_i \leq \frac{k}{q}, z_i = 1\}) \right. \\ \left. - \text{mean}(\{y_i^{(0)} : \frac{k-1}{q} \leq p_i \leq \frac{k}{q}, z_i \neq 1\}) \right].$$

655 **Direct Difference** The most naive estimator takes the difference between the outcomes in  
 656 the treatment group and the outcomes in the control group. The estimator is given by  
 657  $\frac{2}{n} \sum_{i=1}^n (y_i^{(1)} \mathbb{1}_{z_i=1} - y_i^{(0)} \mathbb{1}_{z_i \neq 1})$ .

658 **Adjusted Direct** The estimator adjusts the direct estimate by learning a prediction  $\hat{\mathbf{y}} \approx \mathbf{y}^{(1)} \mathbb{1}_{\mathbf{z}=1} +$   
 659  $\mathbf{y}^{(0)} \mathbb{1}_{\mathbf{z} \neq 1}$ . The estimator is given by  $\frac{2}{n} \sum_{i=1}^n ((y_i^{(1)} - \hat{y}_i) \mathbb{1}_{z_i=1} - (y_i^{(0)} - \hat{y}_i) \mathbb{1}_{z_i \neq 1})$ .

660 **Horvitz-Thompson** The estimator accounts for the (potentially) non-uniform propensity scores.  
 661 Horvitz-Thompson estimator is  $\frac{1}{n} \sum_{i=1}^n \frac{y_i^{(1)}}{p_i} \mathbb{1}_{z_i=1} - \frac{y_i^{(0)}}{1-p_i} \mathbb{1}_{z_i \neq 1}$ . Notice that when  $p_i = \frac{1}{2}$  for all  $i$ ,  
 662 the Horvitz-Thompson estimator is equivalent to the direct estimate.

663 **Doubly Robust Estimator** In addition to accounting for the propensity scores, the estimator uses  
 664 learned predictions  $\hat{\mathbf{y}}^{(1)} \approx \mathbf{y}^{(1)}$  and  $\hat{\mathbf{y}}^{(0)} \approx \mathbf{y}^{(0)}$ . The estimator is  $\frac{1}{n} \sum_{i=1}^n \frac{y_i^{(1)} - \hat{y}_i^{(1)}}{p_i} \mathbb{1}_{z_i=1} -$   
 665  $\frac{y_i^{(0)} - \hat{y}_i^{(0)}}{1-p_i} \mathbb{1}_{z_i \neq 1} + \hat{y}_i^{(1)} + \hat{y}_i^{(0)}$ .

666 **Targeted Maximum Likelihood Estimator (TMLE)** The TMLE adjusts the learned predictions  
 667 with an additional regression step. Because of its complexity, we do not describe the full estimator  
 668 here and instead refer readers to the Step-by-Step Guide in Schuler and Rose [SR17].

669 **Off-policy** The off-policy estimator due to Mou et al. The off-policy estimator is similar to Double-  
 670 Double except that estimator learns a single function with a loss weighted by  $\frac{1}{\pi_i^2} \mathbb{1}_{z_i=1} + \frac{1}{(1-\pi_i)^2} \mathbb{1}_{z_i \neq 1}$ .  
 671 In addition the final estimator differs by a factor of two on some of the terms.

672 **Direct Prediction** The estimator takes the difference between *predictions* for the outcomes under the  
 673 treatment and control. The estimator learns a prediction  $\hat{\mathbf{y}}^{(1)} \approx \mathbf{y}^{(1)} \mathbb{1}_{\mathbf{z}=1}$  and  $\hat{\mathbf{y}}^{(0)} \approx \mathbf{y}^{(0)} \mathbb{1}_{\mathbf{z} \neq 1}$ . The  
 674 estimator is given by  $\frac{1}{n} \sum_{i=1}^n (\hat{y}_i^{(1)} - \hat{y}_i^{(0)})$ .

675 There are many ways to learn functions for the direct predictions. An extensive line of recent  
 676 work uses sophisticated neural network architectures and loss functions to account for confounding  
 677 and other issues. We compare against many of these approaches as implemented in the CATENet  
 678 benchmark<sup>8</sup> [CVdS21a, CVdS21b].

<sup>8</sup>[github.com/AliciaCurth/CATENets](https://github.com/AliciaCurth/CATENets)

## 679 H Differential Privacy Connection

680 The second term in the variance described in Theorem 4.1 measures how much changing an observa-  
 681 tion from the treatment to the control group (and vice versa) affects the adjustment term. Because the  
 682 second term is 0 for observations in the same partition, notice that the second term would disappear if  
 683 we only used half the data for estimating (instead of both learning and estimating). In some sense, we  
 684 can think of the term as the cost of using the same data twice. Since the adjustment term consists of  
 685 the prediction for the treatment and control outcomes, the second term measures how much removing  
 686 the observation from the treatment training set and putting it into the control training set (and vice  
 687 versa) affect the estimators. The quantity is closely related to the requirement of differentially private  
 688 learning: removing an observation from the training set should not change the learned model too  
 689 much. Inspired by this connection, we explore whether a popular differentially private learning  
 690 technique called DP-SGD improves performance [ACG+16, PHK+23]. At each stage of gradient  
 691 descent, DP-SGD clips the magnitude of the gradient and adds a noise term. From the hyperparameter  
 692 search in Figure 7, we find that DP-SGD does not improve the estimator. One explanation is that the  
 693 second term tends to be very small: On the RORCO dataset, we find that the second term is roughly  
 694  $10^{-30}$ .

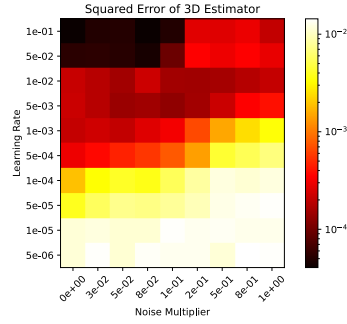

Figure 7: We conduct a hyperparameter search for the Double-Double estimator with differentially private learning. The learning rate controls the step size in gradient descent while the noise multiplier controls the magnitude of the noise added to each gradient. Each square represents the mean squared error on the semi-synthetic data over 100 runs.

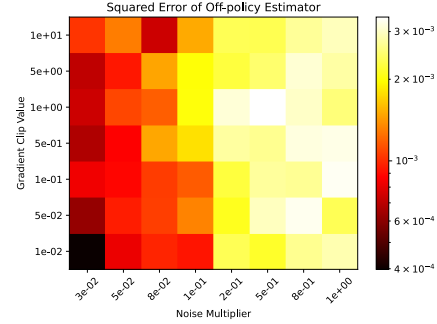

Figure 8: Together, the two heatmaps suggest that the Double-Double estimator with differentially private learning achieves lower squared error and is more robust to hyperparameter choices. We use the heatmaps to choose the hyperparameters for the Off-policy + DP and Double-Double + DP estimators in Table 2.

## I Benchmark on Additional Datasets

We evaluate the performance of estimators on other datasets. As in our RORCO benchmark, the following table is based on (at least) 100 random runs where the randomness is over the data generation process, propensity score estimation, and any internal randomness in the algorithms. For datasets that do not have both treatment and control outcomes for every observation (ACIC 2016, ACIC 2017, Jobs, and News), we use the synthetic propensity scores and outcomes that we designed for the RORCO semi-synthetic dataset.

| Method                    | Mean     | 1st Quartile | 2nd Quartile | 3rd Quartile | Time (s) |
|---------------------------|----------|--------------|--------------|--------------|----------|
| Regression Discontinuity  | 1.46e-03 | 6.33e-04     | 1.09e-03     | 1.95e-03     | 1.05e-03 |
| Propensity Stratification | 1.61e-03 | 1.25e-03     | 1.54e-03     | 1.88e-03     | 2.98e-03 |
| Direct Difference         | 4.45e-01 | 3.85e-01     | 4.34e-01     | 5.03e-01     | 4.92e-04 |
| Adjusted Direct           | 5.78e-03 | 5.11e-03     | 5.78e-03     | 6.35e-03     | 1.35e+01 |
| Horvitz-Thompson          | 5.46e-03 | 7.03e-04     | 3.60e-03     | 7.41e-03     | 4.79e-04 |
| TMLE                      | 1.42e-01 | 5.11e-03     | 2.81e-02     | 8.59e-02     | 2.69e+01 |
| Off-policy                | 3.64e-03 | 2.03e-03     | 3.24e-03     | 4.84e-03     | 1.43e+01 |
| Double-Double             | 1.03e-04 | 1.03e-05     | 4.53e-05     | 1.18e-04     | 2.80e+01 |
| Doubly Robust             | 1.67e-06 | 1.55e-07     | 6.29e-07     | 2.41e-06     | 2.19e+01 |
| Direct Prediction         | 5.08e-03 | 1.37e-03     | 3.69e-03     | 7.63e-03     | 1.38e+01 |
| SNet                      | 5.67e-02 | 1.53e-02     | 4.99e-02     | 9.58e-02     | 2.39e+01 |
| FlexTENet                 | 6.65e-04 | 6.07e-05     | 1.78e-04     | 4.16e-04     | 1.50e+02 |
| OffsetNet                 | 9.26e-04 | 6.43e-04     | 8.80e-04     | 1.07e-03     | 1.37e+02 |
| TNet                      | 7.59e-04 | 2.05e-05     | 9.02e-05     | 2.66e-04     | 1.21e+02 |
| TARNet                    | 6.84e-04 | 3.03e-05     | 1.06e-04     | 2.45e-04     | 1.06e+02 |
| DragonNet                 | 2.07e-02 | 7.07e-03     | 1.83e-02     | 3.22e-02     | 5.66e+00 |
| SNet3                     | 3.98e-02 | 7.13e-03     | 2.83e-02     | 6.37e-02     | 1.46e+01 |
| DRNet                     | 1.41e+01 | 1.32e-03     | 6.56e-03     | 3.61e-02     | 1.31e+02 |
| RANet                     | 7.63e-04 | 2.53e-05     | 8.49e-05     | 2.48e-04     | 1.95e+02 |
| PWNet                     | 1.21e+01 | 4.43e-02     | 4.83e-01     | 6.66e+00     | 1.30e+02 |
| RNet                      | 5.09e-03 | 4.50e-03     | 5.04e-03     | 5.72e-03     | 6.43e+01 |
| XNet                      | 6.74e-04 | 3.09e-05     | 4.16e-04     | 9.68e-04     | 2.41e+02 |

Table 5: Squared error on the semi-synthetic ACIC 2016 dataset.

| Method                    | Mean     | 1st Quartile | 2nd Quartile | 3rd Quartile | Time (s) |
|---------------------------|----------|--------------|--------------|--------------|----------|
| Regression Discontinuity  | 2.77e-03 | 1.69e-03     | 2.30e-03     | 3.58e-03     | 1.01e-03 |
| Propensity Stratification | 1.61e-03 | 1.17e-03     | 1.61e-03     | 1.96e-03     | 2.79e-03 |
| Direct Difference         | 4.18e-01 | 3.64e-01     | 4.10e-01     | 4.61e-01     | 4.91e-04 |
| Adjusted Direct           | 5.74e-03 | 5.05e-03     | 5.72e-03     | 6.43e-03     | 1.10e+01 |
| Horvitz-Thompson          | 5.98e-03 | 8.61e-04     | 3.08e-03     | 7.72e-03     | 4.70e-04 |
| TMLE                      | 3.47e-01 | 8.57e-03     | 3.63e-02     | 1.74e-01     | 2.33e+01 |
| Off-policy                | 4.79e-03 | 2.53e-03     | 3.82e-03     | 6.54e-03     | 2.00e+01 |
| Double-Double             | 6.61e-05 | 7.67e-06     | 3.71e-05     | 9.04e-05     | 3.96e+01 |
| Doubly Robust             | 1.91e-06 | 1.32e-07     | 6.63e-07     | 2.17e-06     | 1.95e+01 |
| Direct Prediction         | 4.23e-03 | 6.91e-04     | 2.73e-03     | 6.54e-03     | 1.28e+01 |
| SNet                      | 4.79e-02 | 1.12e-02     | 3.88e-02     | 7.13e-02     | 2.02e+01 |
| FlexTENet                 | 5.37e-04 | 6.12e-05     | 1.78e-04     | 4.01e-04     | 1.48e+02 |
| OffsetNet                 | 8.82e-04 | 5.67e-04     | 7.68e-04     | 1.10e-03     | 1.32e+02 |
| TNet                      | 1.42e-03 | 2.97e-05     | 1.45e-04     | 4.59e-04     | 1.14e+02 |
| TARNet                    | 1.87e-04 | 3.11e-05     | 1.12e-04     | 2.53e-04     | 1.02e+02 |
| DragonNet                 | 2.17e-02 | 1.02e-02     | 1.77e-02     | 2.94e-02     | 4.35e+00 |
| SNet3                     | 3.35e-02 | 5.25e-03     | 1.57e-02     | 5.48e-02     | 1.35e+01 |
| DRNet                     | 1.80e+02 | 5.76e-04     | 1.83e-03     | 8.69e-03     | 1.20e+02 |
| RANet                     | 1.42e-03 | 3.56e-05     | 1.41e-04     | 4.02e-04     | 1.84e+02 |
| PWNet                     | 2.28e+01 | 1.09e-02     | 2.84e-01     | 1.81e+00     | 1.19e+02 |
| RNet                      | 4.96e-03 | 4.37e-03     | 4.82e-03     | 5.60e-03     | 5.86e+01 |
| XNet                      | 8.89e-04 | 8.33e-05     | 1.98e-04     | 1.16e-03     | 2.24e+02 |

Table 6: Squared error on the semi-synthetic ACIC 2017 dataset.

| Method                    | Mean     | 1st Quartile | 2nd Quartile | 3rd Quartile | Time (s) |
|---------------------------|----------|--------------|--------------|--------------|----------|
| Regression Discontinuity  | 2.26e+00 | 1.54e-01     | 2.40e-01     | 3.35e+00     | 8.37e-04 |
| Propensity Stratification | 1.39e+00 | 8.90e-03     | 2.54e-02     | 2.07e-01     | 1.92e-03 |
| Direct Difference         | 4.23e+02 | 3.09e+01     | 6.48e+01     | 1.61e+02     | 4.19e-04 |
| Adjusted Direct           | 8.59e+00 | 3.09e+00     | 3.75e+00     | 4.94e+00     | 2.10e+00 |
| Horvitz-Thompson          | 3.71e-01 | 1.72e-02     | 4.81e-02     | 2.13e-01     | 3.85e-04 |
| TMLE                      | 5.22e+00 | 6.73e-02     | 3.13e-01     | 1.60e+00     | 3.98e+00 |
| Off-policy                | 5.44e-01 | 3.23e-01     | 4.75e-01     | 6.91e-01     | 2.01e+00 |
| Double-Double             | 2.01e-01 | 3.29e-02     | 1.15e-01     | 3.02e-01     | 4.00e+00 |
| Doubly Robust             | 7.67e-02 | 2.17e-03     | 5.59e-03     | 2.43e-02     | 3.32e+00 |
| Direct Prediction         | 1.86e+00 | 1.10e-02     | 3.97e-02     | 2.12e-01     | 2.08e+00 |
| FlexTENet                 | 1.03e+01 | 1.72e-02     | 5.91e-01     | 1.24e+00     | 1.03e+01 |
| OffsetNet                 | 3.64e+00 | 5.66e-02     | 1.91e-01     | 7.04e-01     | 3.95e+00 |
| TNet                      | 4.38e-01 | 4.00e-02     | 3.34e-01     | 5.98e-01     | 4.51e+00 |
| TARNet                    | 5.16e+00 | 1.04e-02     | 2.46e-01     | 8.00e-01     | 3.44e+00 |
| SNet3                     | 3.77e+00 | 4.46e-01     | 7.55e-01     | 1.09e+00     | 1.33e+01 |
| DRNet                     | 9.79e-01 | 5.71e-02     | 9.00e-02     | 4.38e-01     | 8.99e+00 |
| RANet                     | 3.43e-01 | 3.90e-02     | 1.47e-01     | 5.80e-01     | 7.58e+00 |
| PWNet                     | 9.61e+00 | 4.85e-02     | 5.57e-01     | 1.24e+00     | 8.82e+00 |
| RNet                      | 1.66e+00 | 2.83e-02     | 2.08e-01     | 1.17e+00     | 6.50e+00 |
| XNet                      | 6.13e-01 | 1.44e-02     | 9.30e-02     | 2.35e-01     | 1.10e+01 |

Table 7: Squared error on the IHDP dataset.

| Method                    | Mean     | 1st Quartile | 2nd Quartile | 3rd Quartile | Time (s) |
|---------------------------|----------|--------------|--------------|--------------|----------|
| Regression Discontinuity  | 3.27e-03 | 1.47e-03     | 2.63e-03     | 4.27e-03     | 8.39e-04 |
| Propensity Stratification | 9.73e-04 | 4.03e-04     | 6.05e-04     | 1.06e-03     | 1.88e-03 |
| Direct Difference         | 1.84e-01 | 1.11e-01     | 1.70e-01     | 2.26e-01     | 4.14e-04 |
| Adjusted Direct           | 2.17e-03 | 1.17e-03     | 1.92e-03     | 2.59e-03     | 1.59e+00 |
| Horvitz-Thompson          | 5.85e-03 | 3.42e-04     | 1.71e-03     | 7.87e-03     | 3.81e-04 |
| TMLE                      | 3.43e-03 | 1.19e-04     | 7.15e-04     | 3.49e-03     | 3.40e+00 |
| Off-policy                | 1.15e-03 | 3.94e-04     | 6.85e-04     | 1.04e-03     | 1.84e+00 |
| Double-Double             | 1.40e-04 | 6.04e-06     | 4.01e-05     | 1.43e-04     | 3.56e+00 |
| Doubly Robust             | 3.06e-05 | 8.12e-07     | 4.32e-06     | 1.41e-05     | 2.92e+00 |
| Direct Prediction         | 1.55e-03 | 9.36e-05     | 4.43e-04     | 1.51e-03     | 1.80e+00 |
| SNet                      | 4.88e-03 | 4.17e-04     | 1.80e-03     | 5.01e-03     | 2.96e+01 |
| FlexTENet                 | 2.25e-03 | 5.90e-05     | 3.35e-04     | 1.58e-03     | 8.35e+01 |
| OffsetNet                 | 2.63e-04 | 4.93e-05     | 1.52e-04     | 3.50e-04     | 6.23e+01 |
| TNet                      | 3.23e-03 | 2.04e-04     | 8.16e-04     | 2.90e-03     | 4.63e+01 |
| TARNet                    | 2.05e-03 | 1.09e-04     | 4.18e-04     | 1.57e-03     | 4.84e+01 |
| DragonNet                 | 7.78e-03 | 5.25e-04     | 2.44e-03     | 7.85e-03     | 2.55e+00 |
| SNet3                     | 4.98e-03 | 5.24e-04     | 1.91e-03     | 5.25e-03     | 2.14e+01 |
| DRNet                     | 2.94e-03 | 7.18e-05     | 4.92e-04     | 2.42e-03     | 5.64e+01 |
| RANet                     | 3.25e-03 | 2.16e-04     | 9.16e-04     | 2.96e-03     | 8.09e+01 |
| PWNet                     | 8.08e-03 | 9.05e-04     | 3.59e-03     | 9.82e-03     | 4.93e+01 |
| RNet                      | 5.68e-04 | 2.52e-04     | 4.76e-04     | 7.19e-04     | 2.73e+01 |
| XNet                      | 5.99e-04 | 1.17e-05     | 6.61e-05     | 3.31e-04     | 1.01e+02 |

Table 8: Squared error on the semi-synthetic JOBS dataset.

| Method                    | Mean     | 1st Quartile | 2nd Quartile | 3rd Quartile | Time (s) |
|---------------------------|----------|--------------|--------------|--------------|----------|
| Regression Discontinuity  | 2.28e-03 | 1.23e-03     | 2.09e-03     | 3.25e-03     | 1.16e-03 |
| Propensity Stratification | 4.96e-04 | 3.11e-04     | 5.02e-04     | 6.15e-04     | 2.90e-03 |
| Direct Difference         | 8.14e-02 | 3.39e-02     | 7.18e-02     | 1.27e-01     | 4.86e-04 |
| Adjusted Direct           | 6.00e-04 | 2.14e-04     | 4.78e-04     | 8.84e-04     | 1.20e+01 |
| Horvitz-Thompson          | 7.31e-04 | 7.56e-05     | 2.73e-04     | 8.64e-04     | 4.79e-04 |
| TMLE                      | 2.48e-03 | 5.72e-06     | 3.21e-05     | 1.93e-04     | 2.49e+01 |
| Off-policy                | 5.30e-04 | 2.51e-04     | 4.77e-04     | 7.28e-04     | 1.27e+01 |
| Double-Double             | 1.33e-07 | 2.91e-09     | 1.84e-08     | 8.87e-08     | 2.54e+01 |
| Doubly Robust             | 3.68e-08 | 9.92e-10     | 9.88e-09     | 4.63e-08     | 2.04e+01 |
| Direct Prediction         | 1.30e-05 | 1.13e-06     | 4.41e-06     | 1.64e-05     | 1.24e+01 |
| SNet                      | 2.27e-04 | 2.85e-05     | 1.36e-04     | 3.19e-04     | 7.60e+01 |
| FlexTENet                 | 2.92e-05 | 4.28e-06     | 1.36e-05     | 2.89e-05     | 1.82e+02 |
| OffsetNet                 | 2.66e-05 | 2.43e-06     | 1.02e-05     | 3.05e-05     | 1.33e+02 |
| TNet                      | 2.26e-05 | 2.24e-06     | 1.18e-05     | 2.69e-05     | 1.26e+02 |
| TARNet                    | 2.73e-05 | 1.23e-06     | 1.14e-05     | 3.26e-05     | 9.01e+01 |
| DragonNet                 | 4.90e-05 | 2.26e-06     | 2.43e-05     | 5.97e-05     | 3.83e+01 |
| SNet3                     | 3.88e-04 | 3.90e-05     | 1.88e-04     | 4.79e-04     | 6.14e+01 |
| DRNet                     | 2.83e-05 | 1.40e-06     | 8.82e-06     | 1.91e-05     | 1.90e+02 |
| RANet                     | 2.16e-05 | 3.34e-06     | 1.10e-05     | 3.26e-05     | 1.91e+02 |
| PWNet                     | 6.40e-04 | 4.49e-05     | 2.93e-04     | 8.10e-04     | 1.45e+02 |
| RNet                      | 4.37e-05 | 5.20e-06     | 2.13e-05     | 6.29e-05     | 6.31e+01 |
| XNet                      | 5.69e-06 | 2.70e-07     | 1.02e-06     | 5.90e-06     | 2.41e+02 |

Table 9: Squared error on the semi-synthetic NEWS dataset.

| Method                    | Mean     | 1st Quartile | 2nd Quartile | 3rd Quartile | Time (s) |
|---------------------------|----------|--------------|--------------|--------------|----------|
| Regression Discontinuity  | 4.27e-05 | 2.40e-05     | 3.84e-05     | 6.08e-05     | 1.11e-03 |
| Propensity Stratification | 3.28e-05 | 3.53e-06     | 1.44e-05     | 5.11e-05     | 3.09e-03 |
| Direct Difference         | 2.45e-05 | 2.56e-06     | 1.02e-05     | 3.66e-05     | 4.86e-04 |
| Adjusted Direct           | 1.73e-01 | 1.25e-03     | 4.45e-03     | 2.79e-02     | 1.22e+01 |
| Horvitz-Thompson          | 8.52e-05 | 8.84e-06     | 3.95e-05     | 9.34e-05     | 4.65e-04 |
| TMLE                      | 2.66e+00 | 2.60e-02     | 1.05e-01     | 2.87e-01     | 2.48e+01 |
| Off-policy                | 8.65e-03 | 6.14e-04     | 2.60e-03     | 8.86e-03     | 1.24e+01 |
| Double-Double             | 9.95e-03 | 5.25e-04     | 2.69e-03     | 1.01e-02     | 2.46e+01 |
| Doubly Robust             | 1.89e-02 | 2.20e-04     | 1.30e-03     | 5.40e-03     | 2.10e+01 |
| Direct Prediction         | 1.53e-01 | 2.01e-02     | 8.36e-02     | 2.24e-01     | 1.26e+01 |
| FlexTENet                 | 9.36e+01 | 1.80e-01     | 1.68e+00     | 1.22e+01     | 2.04e+01 |
| OffsetNet                 | 1.19e+00 | 2.78e-02     | 8.62e-02     | 5.83e-01     | 1.61e+01 |
| TNet                      | 2.16e+01 | 3.08e-02     | 2.49e-01     | 9.05e-01     | 1.01e+01 |
| TARNet                    | 4.06e+00 | 4.86e-02     | 1.66e-01     | 8.02e-01     | 9.54e+00 |
| RANet                     | 1.04e+01 | 1.02e-01     | 5.73e-01     | 4.25e+00     | 1.72e+01 |

Table 10: Squared error on the TWINS dataset.

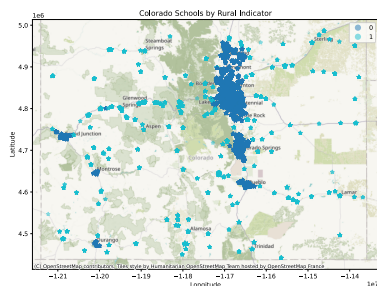

Figure 9: A map of schools in Colorado. The color indicates whether a school is “rural”. At the suggestion of RORCO, we only consider rural schools because, in rural areas, it is a more reasonable assumption that students attend the school closest to their medical provider.

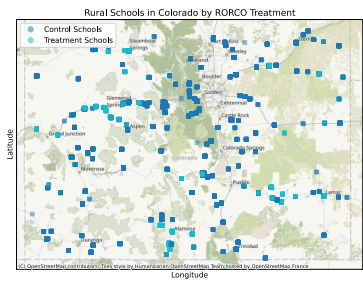

Figure 10: A map of rural K-12 public schools in Colorado. The color indicates whether each grade at the associated school “received” the RORCO treatment. We determine that a grade received the treatment if nearby RORCO clinics gave books to more than half the number of students in the grade.

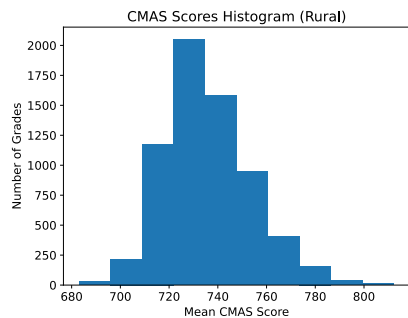

Figure 11: Histogram of CMAS scores by grade for rural schools.

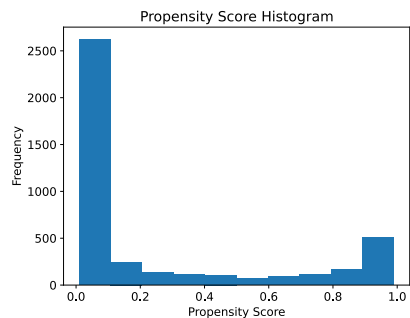

Figure 12: Histogram of propensity scores. Since the dataset is imbalanced (roughly one quarter of observations receive the treatment), the propensities are skewed to 0.



Table 11: A summary of covariates in the RORCO dataset.

|                                | count | mean       | std       | min      | 50%     | max      |
|--------------------------------|-------|------------|-----------|----------|---------|----------|
| Low Grade                      | 4178  | 28.3492    | 29.4807   | 2        | 6       | 90       |
| High Grade                     | 4178  | 73.2312    | 24.9566   | 20       | 80      | 120      |
| Latitude                       | 4178  | 39.0379    | 1.02844   | 37.0191  | 39.2469 | 40.8236  |
| Longitude                      | 4178  | -105.645   | 1.64942   | -108.904 | -105.52 | -102.123 |
| County Code                    | 4178  | 33.529     | 18.9398   | 1        | 32      | 98       |
| District Code                  | 4178  | 1756.8     | 1150.84   | 50       | 1500    | 8001     |
| K-12 Count                     | 4178  | 284.362    | 148.374   | 25       | 259.5   | 1132     |
| Free Lunch                     | 4178  | 92.7475    | 74.8659   | 0        | 75      | 418      |
| Reduced Lunch                  | 4178  | 24.432     | 18.3776   | 0        | 21      | 139      |
| Paid Lunch                     | 4178  | 146.765    | 111.575   | 0        | 128     | 816      |
| Free And Reduced Count         | 4178  | 117.18     | 87.8908   | 0        | 99      | 496      |
| % Free                         | 4178  | 0.330949   | 0.191124  | 0        | 0.32    | 0.831    |
| % Reduced                      | 4178  | 0.0887836  | 0.0487366 | 0        | 0.09    | 0.253    |
| % Free And Reduced             | 4178  | 0.419733   | 0.218246  | 0        | 0.42    | 0.908    |
| Pk-12 Pupil Membership         | 4178  | 295.502    | 149.433   | 25       | 271     | 1132     |
| Sped Count                     | 4178  | 39.2197    | 23.048    | 0        | 35      | 130      |
| Sped Pct                       | 4178  | 0.132976   | 0.0442545 | 0        | 0.131   | 0.316    |
| El Count                       | 4178  | 34.6029    | 51.1494   | 0        | 12      | 234      |
| El Pct                         | 4178  | 0.0994809  | 0.131769  | 0        | 0.042   | 0.764    |
| Homeless Count                 | 4178  | 3.51843    | 6.58953   | 0        | 0       | 52       |
| Homeless Pct                   | 4178  | 0.01232    | 0.0285948 | 0        | 0       | 0.254    |
| Gifted And Talented Count      | 4178  | 13.4165    | 19.9115   | 0        | 7       | 193      |
| Gt Pct                         | 4178  | 0.0411024  | 0.0424374 | 0        | 0.031   | 0.275    |
| Online Count                   | 4178  | 2.98923    | 29.0468   | 0        | 0       | 373      |
| Online Pct                     | 4178  | 0.0128119  | 0.109844  | 0        | 0       | 1        |
| Section 504 Count              | 4178  | 5.07157    | 8.05086   | 0        | 0       | 95       |
| Section 504 Pct                | 4178  | 0.0161197  | 0.0217525 | 0        | 0       | 0.125    |
| Immigrant Count                | 4178  | 2.53614    | 7.83388   | 0        | 0       | 71       |
| Immigrant Pct                  | 4178  | 0.00640522 | 0.0184535 | 0        | 0       | 0.158    |
| Migrant Count                  | 4178  | 0.83102    | 3.05824   | 0        | 0       | 22       |
| Migrant Pct                    | 4178  | 0.00275108 | 0.0106982 | 0        | 0       | 0.082    |
| Distr Code                     | 4178  | 1756.8     | 1150.84   | 50       | 1500    | 8001     |
| Pre-K                          | 4178  | 11.14      | 19.1539   | 0        | 0       | 108      |
| Half-Day K                     | 4178  | 0.0143609  | 0.168886  | 0        | 0       | 3        |
| Full-Day K                     | 4178  | 22.0682    | 24.3982   | 0        | 17      | 98       |
| 2019-2020 students Counted     | 4178  | 322.656    | 170.878   | 1        | 299     | 1202     |
| Days In Session Reported       | 4178  | 141.349    | 25.7376   | 15       | 145     | 230      |
| Attendance Rate*               | 4178  | 0.940132   | 0.0597037 | 0        | 0.946   | 1.181    |
| Truancy Rate**                 | 4178  | 0.0130524  | 0.017604  | 0        | 0.01    | 0.415    |
| Days Attended                  | 4178  | 41074.1    | 23406.6   | 0        | 37366.1 | 179937   |
| student Days Excused Absence   | 4178  | 1955       | 1811.02   | 0        | 1740.25 | 23719.8  |
| student Days Unexcused Absence | 4178  | 565.83     | 650.018   | 0        | 382.5   | 7129.1   |
| Days Possible Attendance       | 4178  | 43591.3    | 24766.8   | 15       | 39675   | 187764   |
| County Code                    | 4178  | 33.529     | 18.9398   | 1        | 32      | 98       |
| Teacher FTE                    | 4178  | 20.5824    | 9.55585   | 2.1      | 19.4    | 67.7     |
| District Code                  | 4178  | 1804.14    | 1261.19   | 50       | 1510    | 8001     |
| FTE                            | 4178  | 51.6705    | 183.902   | 0        | 0       | 1130.07  |
| Average Salary                 | 4178  | 22468.9    | 27367.3   | 0        | 0       | 78568    |
| FTE                            | 4178  | 288.719    | 689.855   | 0        | 86.2612 | 4053.69  |
| Average Salary                 | 4178  | 51776.5    | 11894.6   | 0        | 50639   | 88981    |
| Num_From_Rorco                 | 4178  | 15.8511    | 29.9759   | 0        | 0       | 237      |
| Capacity                       | 4178  | 58.2461    | 45.6389   | 0        | 45      | 306      |
| Half_Rorco                     | 4178  | 0.229536   | 0.420585  | 0        | 0       | 1        |
| Nearby_students                | 4178  | 3651.82    | 2726.3    | 7        | 3290    | 9949     |
| Is_Rural                       | 4178  | 1          | 0         | 1        | 1       | 1        |
